# Supplementary material for: Proteogenomic analysis reveals cytoplasmic sequestration of RUNX1 by the acute myeloid leukemia–initiating CBFB::MYH11 oncofusion protein
Source: PubMed Central journal article supplement (PMC10866659; doi:10.1172/jci176311), 2023-12-07
Supplement: jci-134-176311-s177.pdf [file jci-134-176311-s177.pdf]

## SUPPLEMENTARY MATERIALS

|                                                |    |
|------------------------------------------------|----|
| Supplementary Materials Table of Contents..... | 1  |
| Figure S1.....                                 | 2  |
| Figure S2.....                                 | 3  |
| Figure S3.....                                 | 4  |
| Figure S4.....                                 | 5  |
| Figure S5.....                                 | 6  |
| Figure S6.....                                 | 7  |
| Figure S7.....                                 | 8  |
| Captions for Tables S1-S12.....                | 9  |
| Table S13.....                                 | 10 |
| Table S14.....                                 | 11 |
| Captions for Videos S1-S2.....                 | 12 |
| Supplementary methods.....                     | 13 |
| Supplementary references.....                  | 14 |

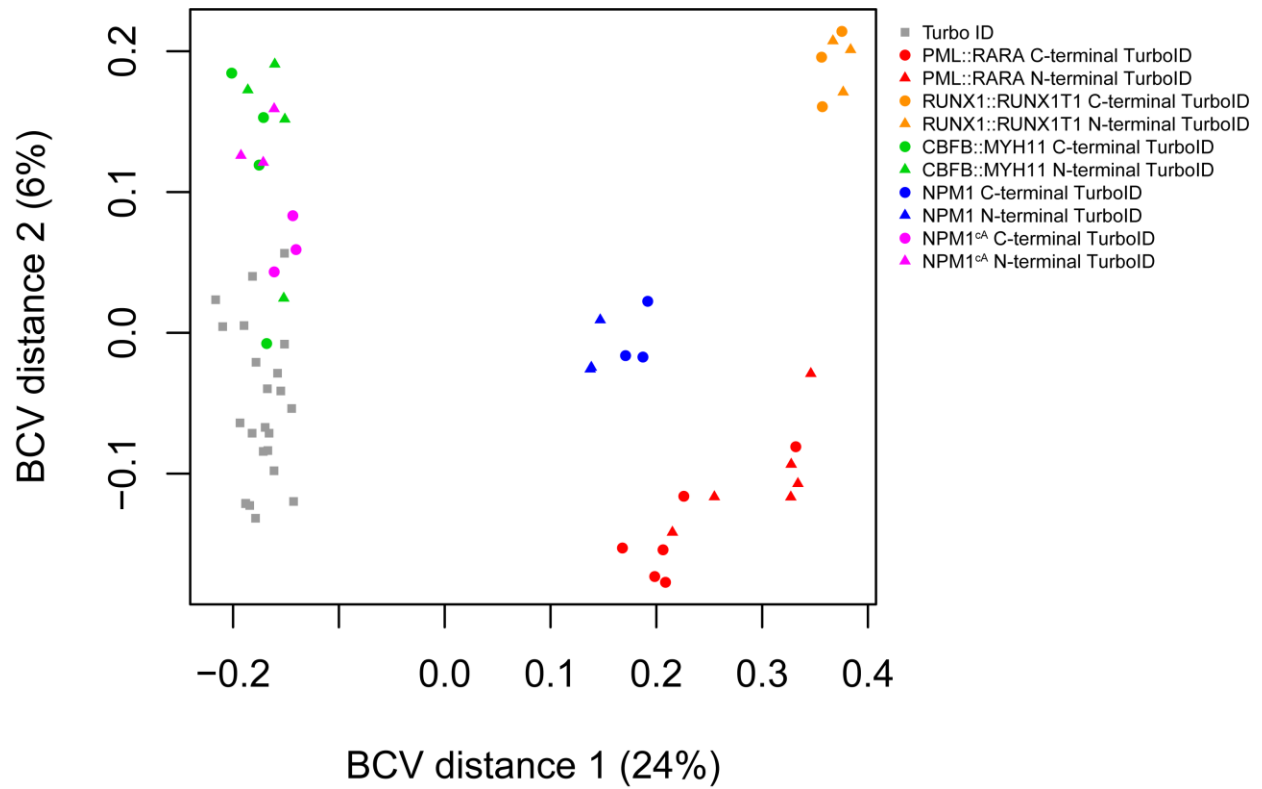

**Figure S1.** Multidimensional scaling plot of TurboID data with the indicated TurboID fusion proteins, separated by N- (triangles) or C-terminal (circles) TurboID fusion. N- and C-terminal fusions do not cluster independently. BCV = biological coefficient of variation.

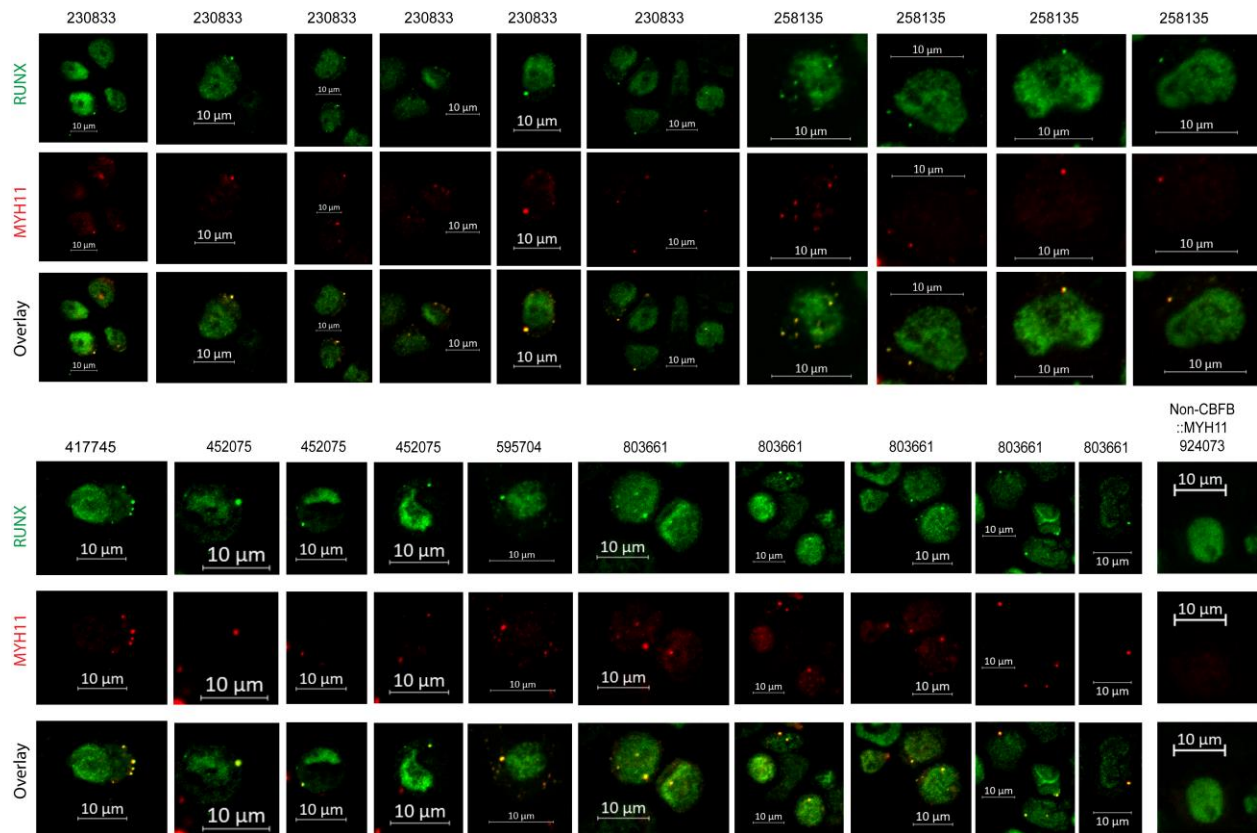

**Figure S2.** Primary human AML cells stained with MYH11 (red) and RUNX1/2/3 (green).  
 Overlay is shown in yellow. The number above each image refers to the unique patient  
 identifier. All samples are from *CBFβ::MYH11* patients except the final sample (924073). Note  
 cytoplasmic MYH11 aggregates with RUNX colocalization in *CBFβ::MYH11* patient samples.  
 Overlay images for 258135 and 417745 are repeated from **Figure 5A**.

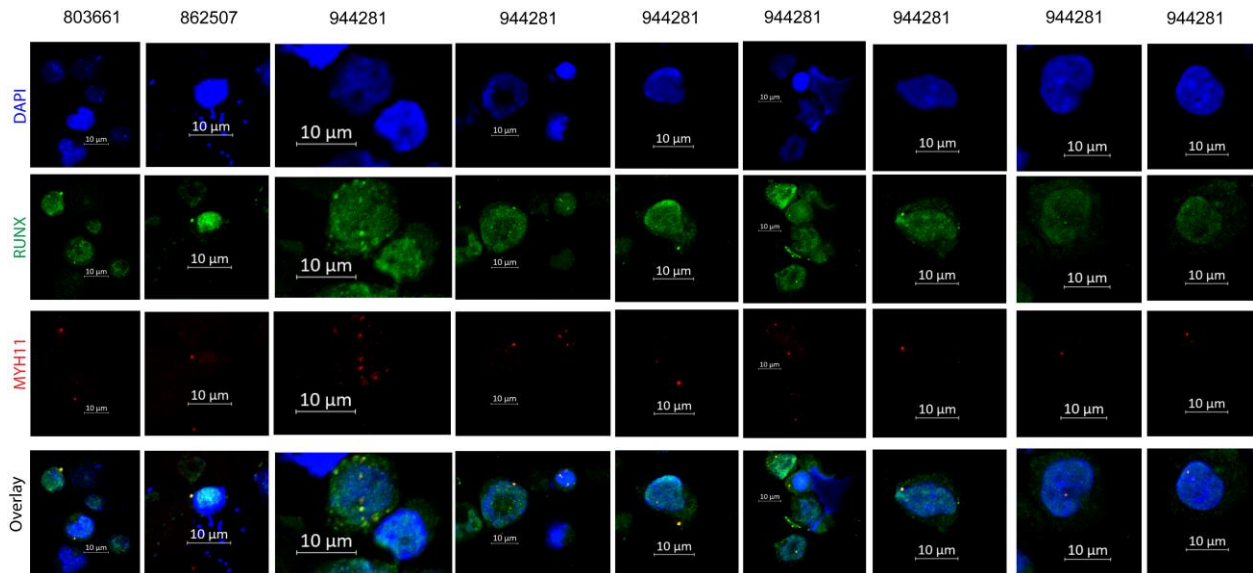

**Figure S3.** Primary human AML cells stained with DAPI (blue), MYH11 (red), and RUNX1/2/3 (green). MYH11/RUNX overlap is shown in yellow. The number above each image refers to the unique patient identifier. All samples are from *CBFB::MYH11* patients. Note cytoplasmic MYH11 aggregates with RUNX colocalization.

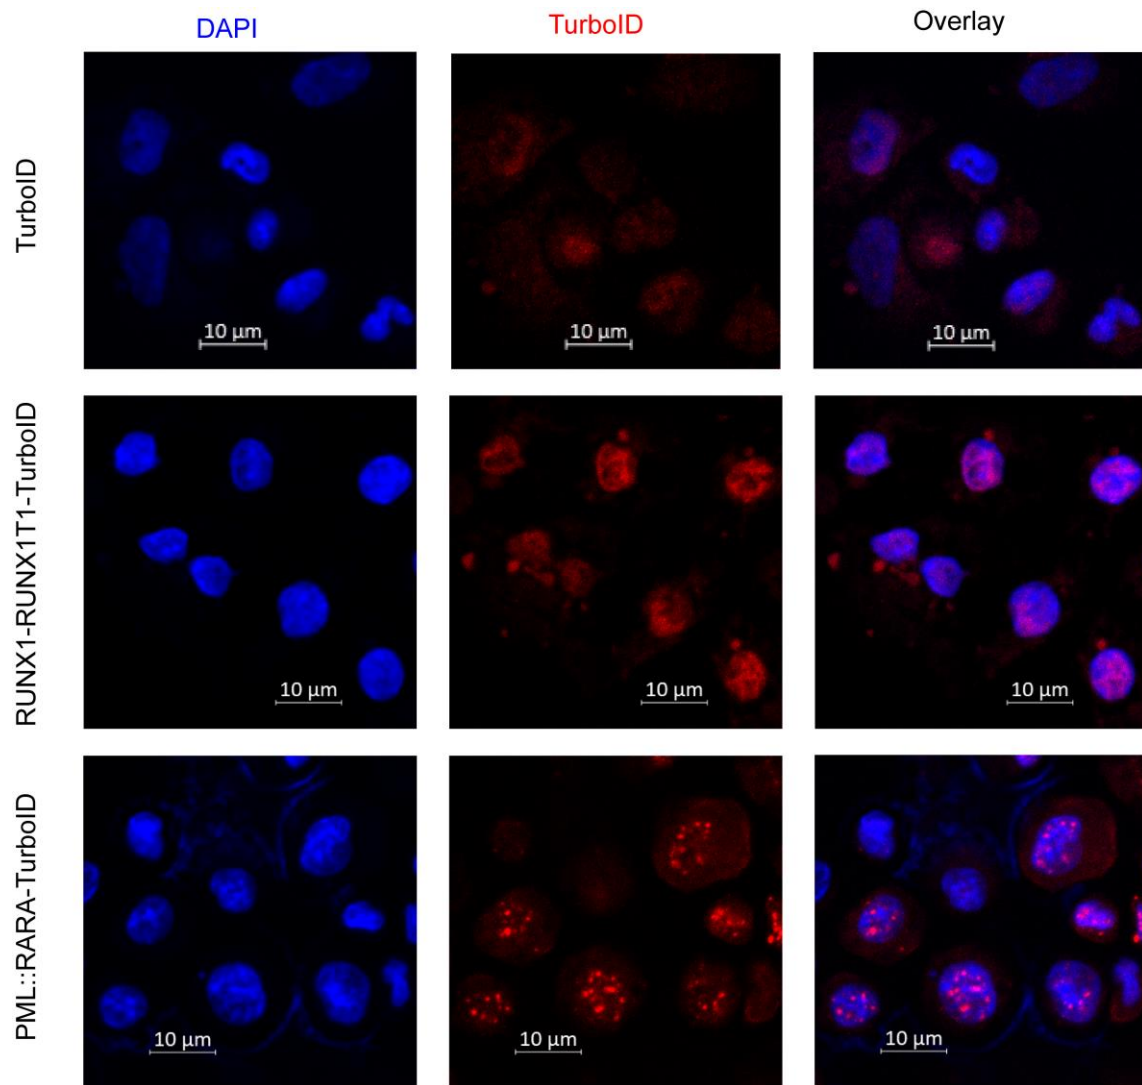

**Figure S4.** Immunofluorescence of primary murine hematopoietic cells transduced with the indicated TurboID fusion proteins. DAPI is shown in blue, and TurboID is shown in red. Note the localization of RUNX1::RUNX1T1-TurboID in the nucleus, and PML::RARA-TurboID in nuclear microspeckles.

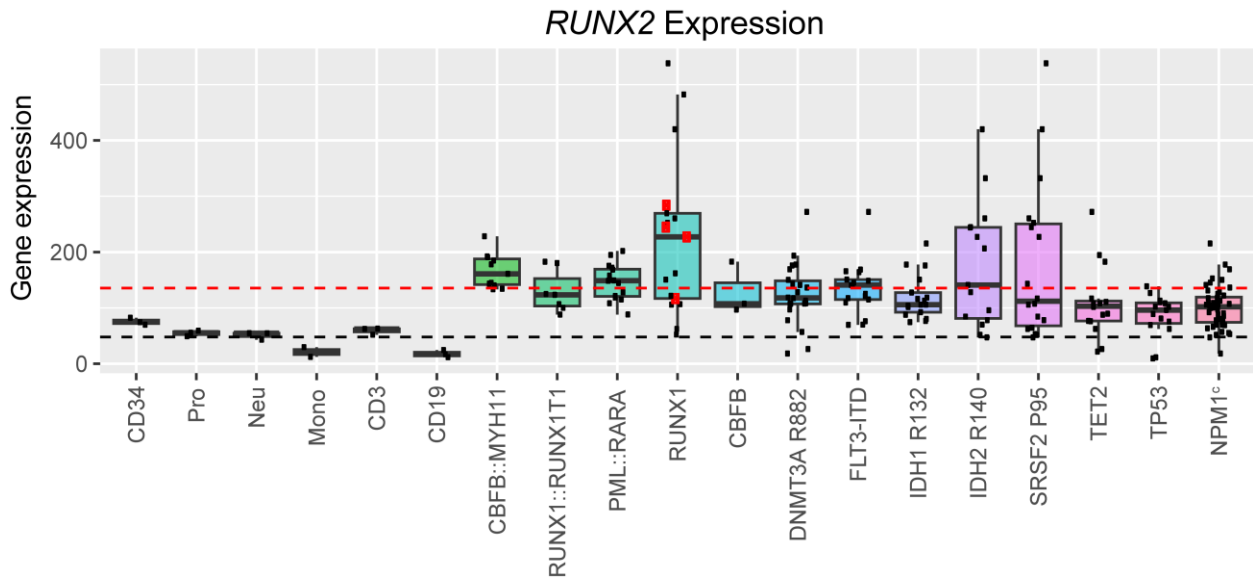

**Figure S5.** *RUNX2* gene expression levels in human AML from the TCGA AML study (1) with the indicated mutations/oncofusions. Black line indicates average *RUNX2* expression in healthy donor cells, and the dotted red line indicates the average *RUNX2* expression in AML cells. Red squares indicate biallelic *RUNX2* mutant samples.

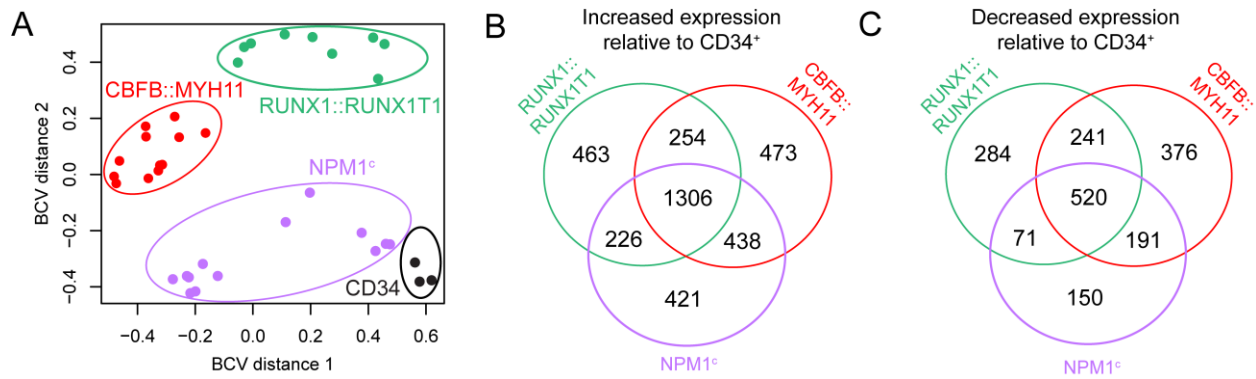

**Figure S6.** A) Multidimensional scaling plot of RNA-Seq data of validation cohort samples from **Figure 7E**). Note that each subgroup has a unique expression signature. B) and C) Venn diagrams of upregulated (B) and downregulated (C) genes relative to healthy donor CD34 cells. Note that *CBFB::MYH11* and *RUNX1::RUNX1T1* samples have distinct sets of dysregulated genes, but also, that most dysregulated genes are also shared with *NPM1<sup>c</sup>* AMLs; many of these probably represent a more general AML-associated expression signature that is not specific for CBF AMLs.

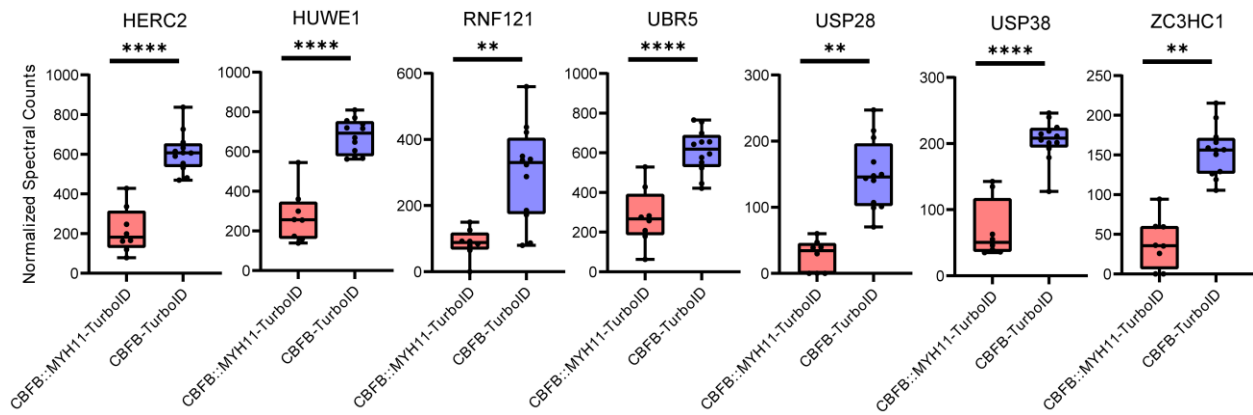

**Figure S7.** Normalized spectral counts of ubiquitin pathway-related differentially-interacting proteins between CBF::MYH11-TurboID (red boxes, n=8) and CBF::TurboID (blue boxes, n=12) in murine hematopoietic cells. Note increased interactions of several ubiquitin pathway proteins with CBF relative to CBF::MYH11. Unpaired t test, \*\*p<0.01, \*\*\*\*p<0.0001.



**Table S1:** Normalized spectral counts for PML::*RARA*-TurboID differentially-interacting proteins versus TurboID alone

**Table S2:** Proteins in curated nuclear complexes. Protein names in red and bold indicate alternative gene names.

**Table S3:** Normalized spectral counts for RUNX1::*RUNX1T1*-TurboID differentially-interacting proteins versus TurboID alone

**Table S4:** Normalized spectral counts for CFBF::*MYH11*-TurboID differentially-interacting proteins versus TurboID alone

**Table S5:** Normalized spectral counts for CFBF-TurboID differentially-interacting proteins versus TurboID alone

**Table S6:** Normalized spectral counts for differentially interacting-proteins between CFBF-TurboID and CFBF::*MYH11*-TurboID

**Table S7:** Normalized RNA-Seq reads for differentially-expressed genes between murine hematopoietic cells transduced with *Empty Vector* MSCV-IRES-GFP (EV) or *CBFB::MYH11* MSCV-IRES-GFP (CM), with passive *CBFB<sup>N104A</sup>::MYH11* MSCV-IRES-GFP samples.

**Table S8:** Normalized RNA-Seq reads for differentially-expressed genes between human healthy donor CD34<sup>+</sup> cells and human *RUNX1::RUNX1T1* AML samples, with passive *CBFB::MYH11* and *NPM1<sup>c</sup>*-mutated AMLs.

**Table S9:** Normalized RNA-Seq reads for differentially-expressed genes between human healthy donor CD34<sup>+</sup> cells and human *CBFB::MYH11* AML samples, with passive *RUNX1::RUNX1T1* and *NPM1<sup>c</sup>*-mutated AMLs.

**Table S10:** Normalized RNA-Seq reads for differentially-expressed genes between human healthy donor CD34<sup>+</sup> cells and human *NPM1<sup>c</sup>*-mutated AML samples, with passive *RUNX1::RUNX1T1* and *CBFB::MYH11* AMLs.

**Table S11:** Human RNA-Seq samples

**Table S12:** Human AML immunofluorescence and Western blot samples

| Repressor | Cells       | Type                          | Species                       | Details                                     | Ref    |
|-----------|-------------|-------------------------------|-------------------------------|---------------------------------------------|--------|
| SIN3A     | COS-7       | Kidney fibroblast cell line   | <i>Cercopithecus aethiops</i> | Co-transfected RUNX1 CBF::MYH11 GAL4 fusion | (2, 3) |
|           | ME-1        | CBF::MYH11 leukemia cell line | <i>Homo sapiens</i>           | Endogenous                                  | (3, 4) |
| HDAC8     | COS-7       | Kidney fibroblast cell line   | <i>Cercopithecus aethiops</i> | Co-transfected HDAC8 and CBF::MYH11         | (3)    |
|           | 32Dcl2      | Myeloid cell line             | <i>Mus musculus</i>           |                                             | (5)    |
|           | ME-1        | CBF::MYH11 leukemia cell line | <i>Homo sapiens</i>           | Interaction not detected                    | (3)    |
| HDAC1     | COS-7       | Kidney fibroblast cell line   | <i>Cercopithecus aethiops</i> | Co-transfected HDAC1 and CBF::MYH11         | (6)    |
|           | ME-1        | CBF::MYH11 leukemia cell line | <i>Homo sapiens</i>           | Co-transfected                              | (6)    |
|           | Primary AML | <i>Cbfb::Myh11</i> knock-in   | <i>Mus musculus</i>           | Endogenous                                  | (6)    |
| BMI-1     | ME-1        | CBF::MYH11 leukemia cell line | <i>Homo sapiens</i>           | Endogenous                                  | (4)    |
|           | HeLa        | Cervical cancer cell line     | <i>Homo sapiens</i>           | Endogenous                                  | (7)    |
| RING1B    | ME-1        | CBF::MYH11 leukemia cell line | <i>Homo sapiens</i>           | Endogenous                                  | (7)    |
|           | HeLa        | Cervical cancer cell line     | <i>Homo sapiens</i>           | Endogenous                                  | (7)    |

**Table S13.** Summary of reported interactions between CBF::MYH11 and transcriptional repressors. None of these proteins were detected as CBF::MYH11 interactors in primary mouse hematopoietic cells by TurboID proximity labeling (**Figure 2G, Table S4**).

| Cells                 | Type                        | Species                       | Method          | Localization                   | Notes                                                                                       | Ref       |
|-----------------------|-----------------------------|-------------------------------|-----------------|--------------------------------|---------------------------------------------------------------------------------------------|-----------|
| COS-7                 | Kidney fibroblast cell line | <i>Cercopithecus aethiops</i> | N/C split       | Both                           | GAL4-tagged CFBF::MYH11                                                                     | (2)       |
| NIH3T3                | Fibroblast cell line        | <i>Mus musculus</i>           | IF<br>N/C split | Nuclear<br>Cytoplasmic<br>Both | Requires RUNX1<br>Independent of RUNX1<br>Requires MYH11 C-terminus/ACD<br>Sequesters RUNX1 | (2, 8–10) |
| Embryonic fibroblasts | Primary fibroblasts         | <i>Mus musculus</i>           | B-gal           | Both                           | <i>Cbfb::Myh11</i> knock-in at <i>Cbfb</i> locus<br>Location inferred from RUNX1 location   | (10)      |
| Ba/F3                 | Pro-B cell line             | <i>Mus musculus</i>           | IF<br>N/C split | Nuclear<br>Both                | RUNX1 required<br>MYH11 C-terminus/ACD required                                             | (11–13)   |
| 32Dcl3                | Myeloid cell line           | <i>Mus musculus</i>           | IF<br>N/C split | Nuclear                        |                                                                                             | (5, 11)   |
| Jurkat                | T cell line                 | <i>Homo sapiens</i>           | IF              | Cytoplasmic                    |                                                                                             | (14)      |
| K562                  | Erythro-leukemia cell line  | <i>Homo sapiens</i>           | IF              | Cytoplasmic                    |                                                                                             | (15)      |
| AML                   | Primary AML                 | <i>Homo sapiens</i>           | IF<br>N/C split | Nuclear                        | Endogenous CFBF::MYH11                                                                      | (16)      |
| C2C12                 | Myoblast cell line          | <i>Mus musculus</i>           | IF              | Cytoplasmic                    |                                                                                             | (17)      |
| 293                   | Embryonic kidney            | <i>Homo sapiens</i>           | IF              | Nuclear and cytoplasmic        |                                                                                             | (18)      |

**Table S14.** Summary of CFBF::MYH11 subcellular localization reported by immunofluorescence (IF) or nuclear-cytoplasmic fractionation and Western blotting (N/C split) organized by cell type. Note that nuclear-cytoplasmic fractionations have reported nuclear CFBF::MYH11 in cell lines with verified cytoplasmic CFBF::MYH11 by IF, attributed to precipitation of CFBF::MYH11 aggregates with nuclei (10).

**Supplemental Video S1:** 3D reconstruction of murine hematopoietic cell expressing CBFβ::MYH11-GFP. Transduced cells were spun onto coverslips and allowed to recover normal shape overnight to minimize flattening artifacts. Cells were then stained for DAPI (blue), CBFβ::MYH11-GFP (direct GFP imaging), and RUNX1 (red); CBFβ::MYH11-GFP overlap with RUNX1 is shown in yellow. Serial confocal images were obtained, then reconstructed into a 3D video using Volocity software (Quorum Technologies).

**Supplemental Video S2:** 3D reconstruction of murine hematopoietic cell expressing CBFβ<sup>N104A</sup>::MYH11-GFP. Transduced cells were spun onto coverslips and allowed to recover normal shape overnight to minimize flattening artifacts. Cells were then stained for DAPI (blue), CBFβ<sup>N104A</sup>::MYH11-GFP (direct GFP imaging), and RUNX1 (red). Serial confocal images were obtained, then reconstructed into a 3D video using Volocity software (Quorum Technologies).

## **SUPPLEMENTARY METHODS**

**Proteomics Data Processing:** Unprocessed data from the mass spectrometer were converted to peak lists using Proteome Discoverer (version 2.1.0.81, Thermo-Fischer Scientific). The MS2 spectra from peptides with +2, +3 and +4 charge states were analyzed using Mascot software(19) (Matrix Science, London, UK; version 2.5.1). Mascot was set up to search against a custom non-redundant database of mouse proteins (16,997 entries, based on mouse proteome download from Uniprot March 2021). The digestion enzyme was trypsin with a maximum of 4 missed cleavages allowed. The searches were performed with a fragment ion mass tolerance of 50 ppm and a parent ion tolerance of 25 ppm. Carbamidomethylation of cysteine was specified in Mascot as a fixed modification. Deamidation of asparagine, deamidation of glutamine, pyro-glutamate formation from n-terminal glutamine, acetylation of protein N-terminus and oxidation of methionine were specified as variable modifications. Peptides were filtered in Scaffold (version 5.2.1, Proteome Software Inc., Portland, OR) at 1% false-discovery rate (FDR) by searching against a reversed protein sequence database and a minimum of 2 peptides were required for protein identification.

## WORKS CITED

1. Cancer Genome Atlas Research Network, et al. Genomic and epigenomic landscapes of adult de novo acute myeloid leukemia. *N Engl J Med.* 2013;368(22):2059–2074.
2. Lutterbach B, et al. The inv(16) encodes an acute myeloid leukemia 1 transcriptional corepressor. *Proc Natl Acad Sci U S A.* 1999;96(22):12822–12827.
3. Durst KL, et al. The inv(16) fusion protein associates with corepressors via a smooth muscle myosin heavy-chain domain. *Mol Cell Biol.* 2003;23(2):607–619.
4. Mandoli A, et al. CBFβ-MYH11/RUNX1 together with a compendium of hematopoietic regulators, chromatin modifiers and basal transcription factors occupies self-renewal genes in inv(16) acute myeloid leukemia. *Leukemia.* 2014;28(4):770–778.
5. Qi J, et al. HDAC8 Inhibition Specifically Targets Inv(16) Acute Myeloid Leukemic Stem Cells by Restoring p53 Acetylation. *Cell Stem Cell.* 2015;17(5):597–610.
6. Richter LE, et al. HDAC1 Is a Required Cofactor of CBFβ-SMMHC and a Potential Therapeutic Target in Inversion 16 Acute Myeloid Leukemia. *Mol Cancer Res.* 2019;17(6):1241–1252.
7. Cordonnier G, et al. CBFβ-SMMHC Affects Genome-wide Polycomb Repressive Complex 1 Activity in Acute Myeloid Leukemia. *Cell Rep.* 2020;30(2):299-307.e3.
8. Wijmenga C, et al. Core binding factor beta-smooth muscle myosin heavy chain chimeric protein involved in acute myeloid leukemia forms unusual nuclear rod-like structures in transformed NIH 3T3 cells. *Proc Natl Acad Sci U S A.* 1996;93(4):1630–1635.
9. Lu J, et al. Subcellular localization of the alpha and beta subunits of the acute myeloid leukemia-linked transcription factor PEBP2/CBF. *Mol Cell Biol.* 1995;15(3):1651–1661.

10. Adya N, et al. The Leukemic Protein Core Binding Factor  $\beta$  (CBF $\beta$ )–Smooth-Muscle Myosin Heavy Chain Sequesters CBF $\alpha$ 2 into Cytoskeletal Filaments and Aggregates. *Mol Cell Biol.* 1998;18(12):7432–7443.
11. Cao W, et al. CBF beta-SMMHC, expressed in M4Eo AML, reduced CBF DNA-binding and inhibited the G1 to S cell cycle transition at the restriction point in myeloid and lymphoid cells. *Oncogene.* 1997;15(11):1315–1327.
12. Cao W, et al. The core binding factor (CBF) alpha interaction domain and the smooth muscle myosin heavy chain (SMMHC) segment of CBFbeta-SMMHC are both required to slow cell proliferation. *J Biol Chem.* 1998;273(47):31534–31540.
13. Kummalue T, Lou J, Friedman AD. Multimerization via its myosin domain facilitates nuclear localization and inhibition of core binding factor (CBF) activities by the CBFbeta-smooth muscle myosin heavy chain myeloid leukemia oncoprotein. *Mol Cell Biol.* 2002;22(23):8278–8291.
14. Kanno Y, et al. Cytoplasmic Sequestration of the Polyomavirus Enhancer Binding Protein 2 (PEBP2)/Core Binding Factor  $\alpha$  (CBF $\alpha$ ) Subunit by the Leukemia-Related PEBP2/CBF $\beta$ -SMMHC Fusion Protein Inhibits PEBP2/CBF-Mediated Transactivation. *Mol Cell Biol.* 1998;18(7):4252–4261.
15. Liu P, et al. CFBF-MYH11 Fusion Sequesters RUNX1 in Cytoplasm to Prevent DNMT3A Recruitment to Target Genes in AML. *Front Cell Dev Biol.* 2021;9:1807.
16. Liu PP, et al. Identification of the chimeric protein product of the CFBF-MYH11 fusion gene in inv(16) leukemia cells. *Genes Chromosomes Cancer.* 1996;16(2):77–87.
17. Tanaka Y, et al. The chimeric protein, PEBP2 beta/CBF beta-SMMHC, disorganizes cytoplasmic stress fibers and inhibits transcriptional activation. *Oncogene.* 1998;17(6):699–708.

18. Zhao L, et al. The C-terminal multimerization domain is essential for leukemia development by CBF $\beta$ -SMMHC in a mouse knockin model. *Leukemia*. 2017;31(12):2841–2844.

19. Perkins DN, et al. Probability-based protein identification by searching sequence databases using mass spectrometry data. *Electrophoresis*. 1999;20(18):3551–3567.
